# Supplementary material for: A single-chain antibody generation system yielding CAR-T cells with superior antitumor function
Source: PubMed Central journal article supplement (PMC7925539; doi:10.1038/s42003-021-01791-1), 2021-03-02
Supplement: 42003_2021_1791_MOESM1_ESM.pdf [file 42003_2021_1791_MOESM1_ESM.pdf]

## **A single-chain antibody generation system yielding CAR-T cells with superior antitumor function**

Toshiki Ochi<sup>1,2</sup>, Masaki Maruta<sup>1</sup>, Kazushi Tanimoto<sup>1</sup>, Fumitake Kondo<sup>1</sup>, Toshihiro Yamamoto<sup>3</sup>, Mie Kurata<sup>3,4</sup>, Hiroshi Fujiwara<sup>1,5</sup>, Junya Masumoto<sup>3,4</sup>, Katsuto Takenaka<sup>1</sup>, Masaki Yasukawa<sup>2,6</sup>

<sup>1</sup>Department of Hematology, Clinical Immunology, and Infectious Diseases, Ehime University Graduate School of Medicine, Toon, Ehime 791-0295, Japan; <sup>2</sup>Division of Immune Regulation, Proteo-Science Center, Ehime University, Toon, Ehime 791-0295, Japan; <sup>3</sup>Department of Analytical Pathology, Ehime University Graduate School of Medicine, Ehime University, Toon, Ehime 791-0295, Japan; <sup>4</sup>Division of Pathology, Proteo-Science Center, Ehime University, Toon, Ehime 791-0295, Japan; <sup>5</sup>Department of Personalized Cancer Immunotherapy, Mie University Graduate School of Medicine, Tsu, Mie 514-8507, Japan; <sup>6</sup>Ehime Prefectural University of Health Sciences, Tobe, Ehime 791-2101, Japan.

### **Corresponding author**

Toshiki Ochi, MD, PhD

Department of Hematology, Clinical Immunology and Infectious Diseases,

Ehime University Graduate School of Medicine

Shitsukawa, Toon, Ehime 791-0295, Japan

Phone: +81-89-960-5296

Fax: +81-89-960-5299

E-mail: [ochi.toshiki.eg@ehime-u.ac.jp](mailto:ochi.toshiki.eg@ehime-u.ac.jp)

# Supplementary Figure 1

**a**

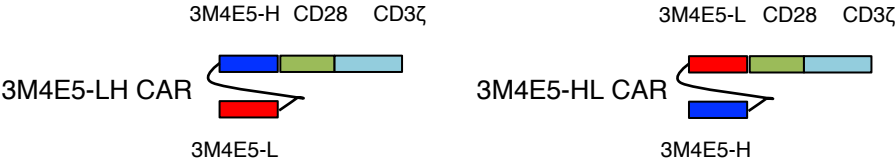

**b**

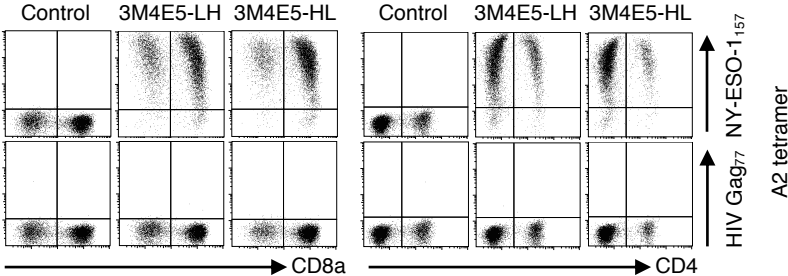

**c**

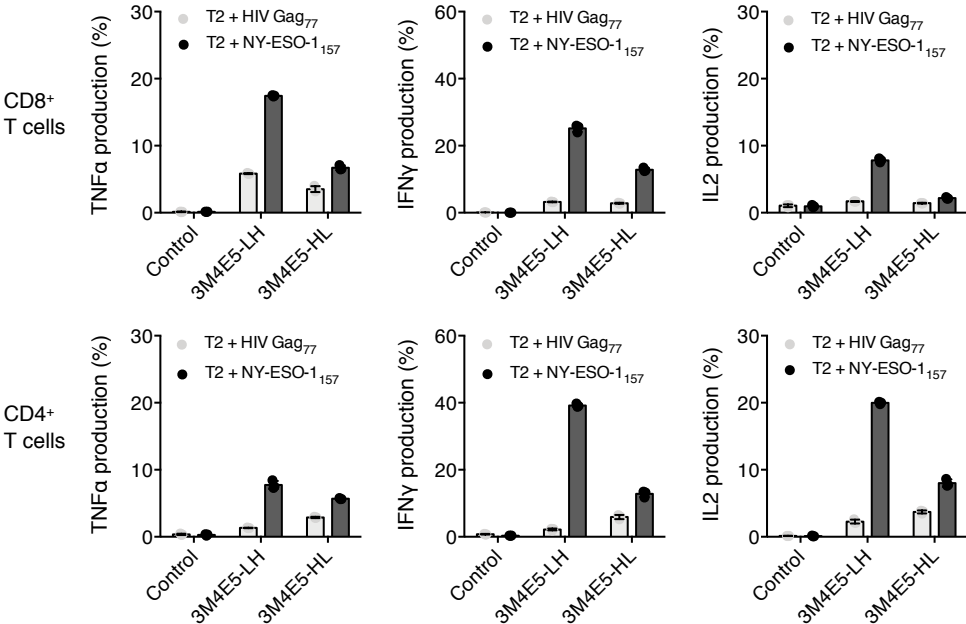

**Supplementary Figure 1. 3M4E5 CAR-T cells recognized A2/NY-ESO-1<sub>157</sub>.**

**a** Second-generation CAR (clone 3M4E5) specific for A2/NY-ESO-1<sub>157</sub>. An A2/NY-ESO-1<sub>157</sub>-specific scFv (3M4E5-LH or 3M4E5-HL) was fused with the CD28 and CD3 $\zeta$  chains. **b** A2/NY-ESO-1<sub>157</sub>-specific CAR CD8<sup>+</sup> T cells and CD4<sup>+</sup> T cells were stained with 5  $\mu$ g/mL A2/NY-ESO-1<sub>157</sub> tetramer or A2/HIV Gag<sub>77</sub> tetramer. **c** A2/NY-ESO-1<sub>157</sub> CAR-T cells were incubated with T2 cells loaded with 10  $\mu$ g/mL NY-ESO-1<sub>157</sub> peptide or HIV Gag<sub>77</sub> peptide, and their cytokine production was measured by intracellular cytokine assays. The experiments were performed in triplicate, and error bars demonstrate the SD.

Supplementary Figure 2

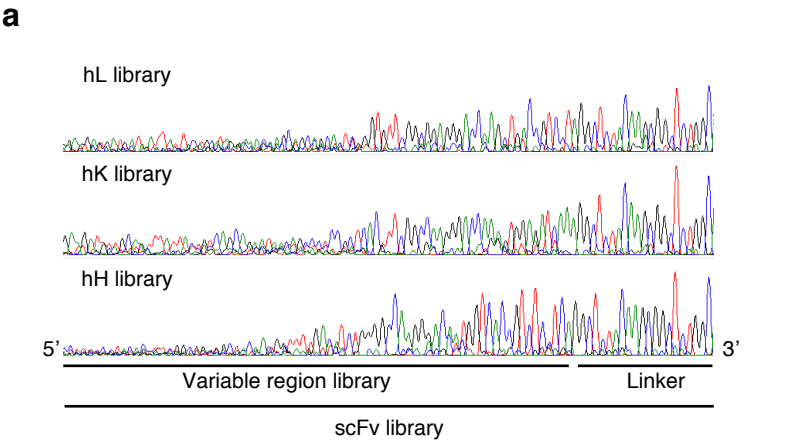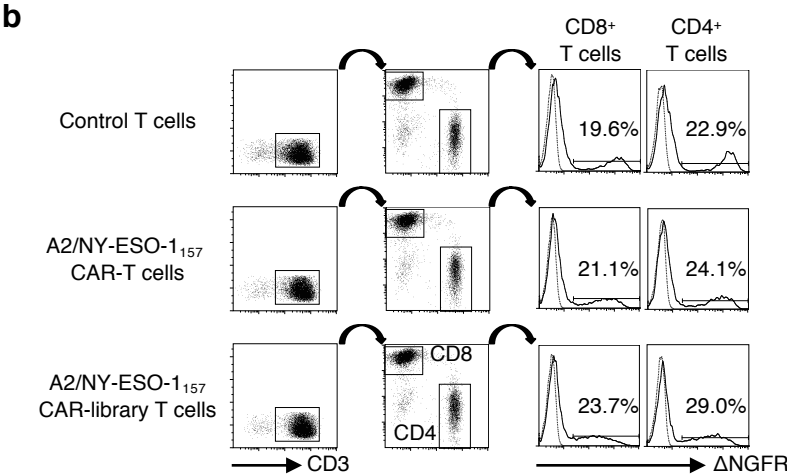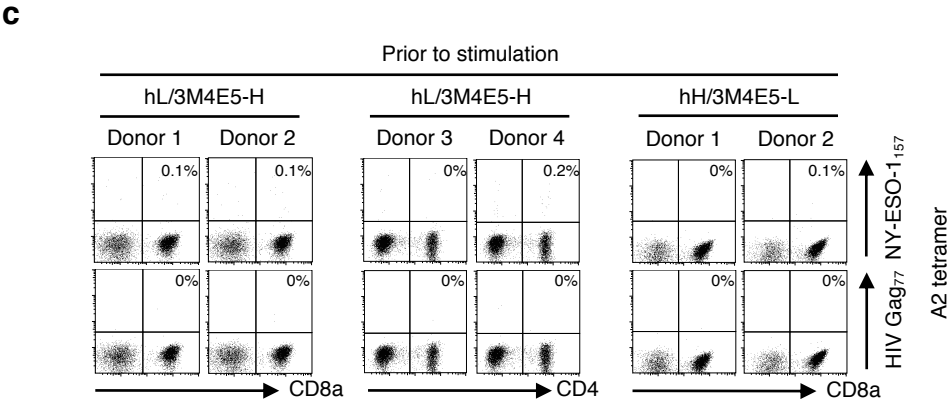

**Supplementary Figure 2. Generation of A2/NY-ESO-1<sub>157</sub> CAR-library T cells.**

**a** An scFv library in which a variable region library from the lambda chain (hL), kappa chain (hK), or heavy chain (hH) was fused with 3M4E5-H or 3M4E5-L via a linker sequence. A representative chromatogram of each scFv library is shown. **b** Second-generation CAR encoding an scFv library followed by CD28 $\zeta$  was transduced into peripheral blood T cells. Control T cells and the original A2/NY-ESO-1<sub>157</sub> CAR-T cells (3M4E5-LH CAR-T cells) were prepared as a negative control and a positive control, respectively.  $\Delta$ NGFR positivity in gene-modified CD8<sup>+</sup> T cells and CD4<sup>+</sup> T cells was measured by flow cytometry. The dotted line shows an isotype control. Representative dot plots and histograms are depicted. **c** A2/NY-ESO-1<sub>157</sub> CAR-library T cells prior to stimulation were stained with 20  $\mu$ g/mL A2/NY-ESO-1<sub>157</sub> tetramer or A2/HIV Gag<sub>77</sub> tetramer, and each dot plot is shown. Each percentage of A2/NY-ESO-1<sub>157</sub> tetramer-positive cells among CAR-library T cells is shown. Stainings of the A2/NY-ESO-1<sub>157</sub> CAR-library T cells after antigen-specific stimulation are depicted in Fig. 2a.

# Supplementary Figure 3

**a**

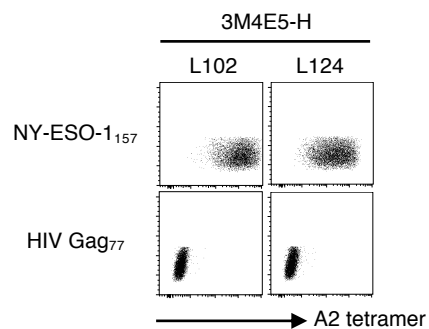

**b**

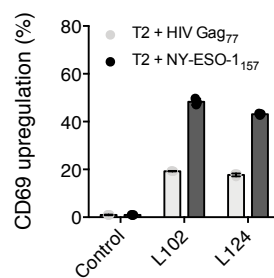

**c**

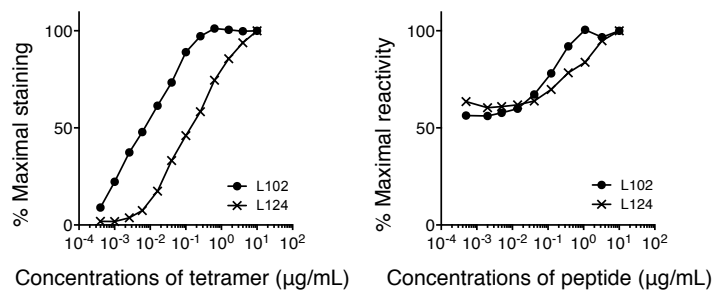

**d**

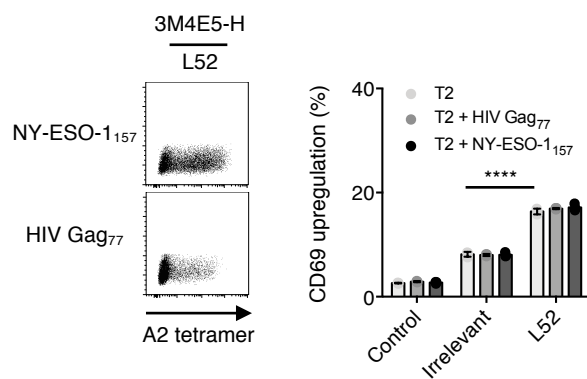

**Supplementary Figure 3. Characteristics of new scFv-expressing A2/NY-ESO-1<sub>157</sub> CAR-T cells.**

**a** CAR encoding a new light chain (L102, or L124) paired with 3M4E5-H was individually reconstituted in Jurkat 76 cells. Jurkat 76/CAR transfectants were stained with 5 µg/mL A2/NY-ESO-1<sub>157</sub> tetramer or A2/HIV Gag<sub>77</sub> tetramer. **b** Jurkat 76/CAR transfectants were incubated with T2 cells pulsed with 10 µg/mL NY-ESO-1<sub>157</sub> peptide or HIV Gag<sub>77</sub> peptide. CD69 upregulation of the transfectants was measured by flow cytometry. The experiments were performed in triplicate, and error bars show the SD. **c** Jurkat 76/CAR transfectants were stained with graded concentrations of A2/NY-ESO-1<sub>157</sub> tetramer (left). They were also incubated with T2 cells pulsed with graded concentrations of A2/NY-ESO-1<sub>157</sub> peptide (right). Percentage maximal staining and percentage maximal reactivity of each transfectant was calculated, similarly to Fig. 2f. **d** The Jurkat 76/CAR transfectant expressing clone L52 paired with 3M4E5-H as the scFv was stained with 5 µg/mL A2/NY-ESO-1<sub>157</sub> or A2/HIV Gag<sub>77</sub> tetramer. CD69 upregulation of L52 CAR-T cells, irrelevant CAR-T cells, and control T cells was also measured by flow cytometry. The experiments were performed in triplicate, and error bars show the SD. Welch's t test (two-sided) was performed for comparison. \*\*\*\*,  $p < 0.0001$ .

# Supplementary Figure 4

**a**

| Peptide                     | Sequence                                                                                  | Binding affinity (nM) |
|-----------------------------|-------------------------------------------------------------------------------------------|-----------------------|
| NY-ESO-1 <sub>157-165</sub> | <u>S</u> <u>I</u> <u>L</u> <u>L</u> <u>M</u> <u>W</u> <u>I</u> <u>T</u> <u>Q</u> <u>C</u> | 666.69                |
| LYPLAL1 <sub>36-44</sub>    | <u>G</u> <u>L</u> <u>R</u> <u>M</u> <u>W</u> <u>I</u> <u>K</u> <u>Q</u> <u>V</u>          | 1859.63               |

**b**

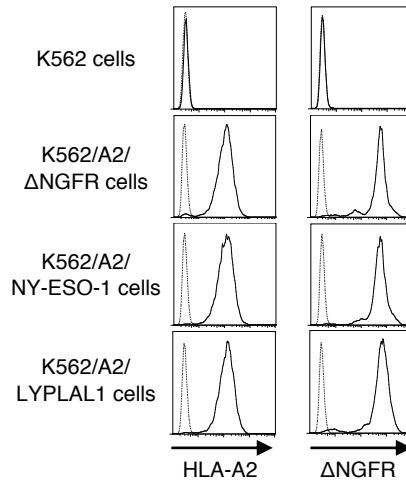

**c**

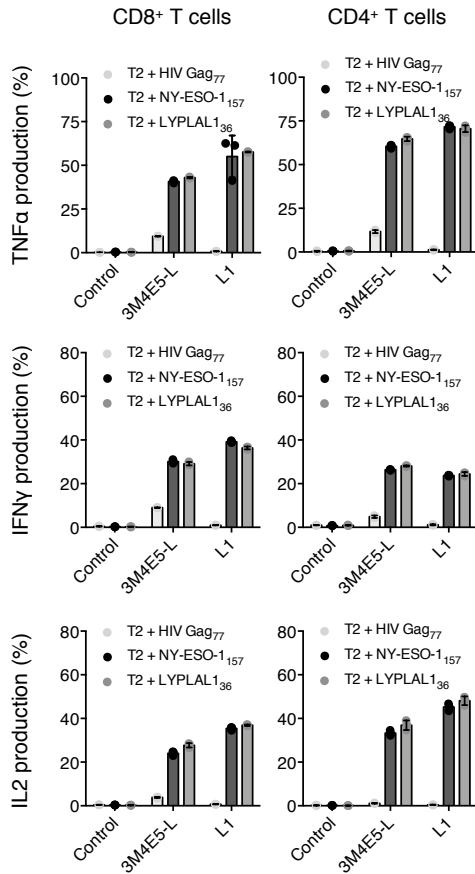

**d**

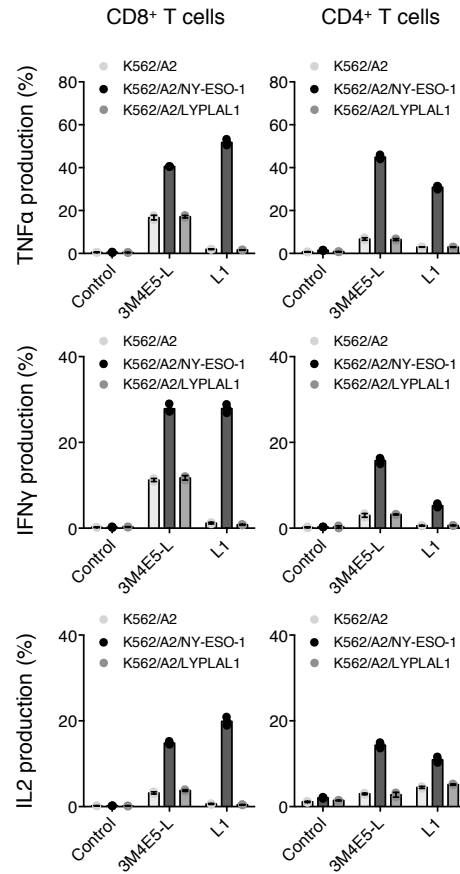



**Supplementary Figure 4. Assessment of potential cross-reactivity mediated by L1 CAR-T cells.**

**a** Based on the peptide sequence motif (xLxMWIxQx) revealed by alanine scanning assays, one potential cross-reactive peptide, LYPLAL<sub>136-44</sub>, was identified. The amino acid sequences of NY-ESO-1<sub>157</sub> and LYPLAL<sub>136</sub> peptides, and their predicted binding capacity to HLA-A\*02:01 using netMHC4.0 (<http://www.cbs.dtu.dk/services/NetMHC/>) are also shown. **b** HLA-A2 and  $\Delta$ NGFR expressions of K562 cells, K562/A2 cells, K562/A2/NY-ESO-1 cells, and K562/A2/LYPLAL1 cells were assessed by flow cytometry. The  $\Delta$ NGFR gene was employed as a tag gene, as described in Methods. The dotted line shows an isotype control. **c, d** L1 CAR-T cells and 3M4E5-L CAR-T cells were incubated with T2 cells loaded with 10  $\mu$ g/mL NY-ESO-1<sub>157</sub> peptide, LYPLAL<sub>136</sub> peptide, or HIV Gag<sub>77</sub> peptide (**c**). Then, these CAR-T cells were cocultured with K562-based target cells (**d**). Cytokine production by CAR-T cells was assessed using intracellular cytokine assays. The experiments were performed in triplicate, and error bars demonstrate the SD. The control T cells and CAR-T cells were prepared and analyzed similarly to Fig. 3.

# Supplementary Figure 5

**a**

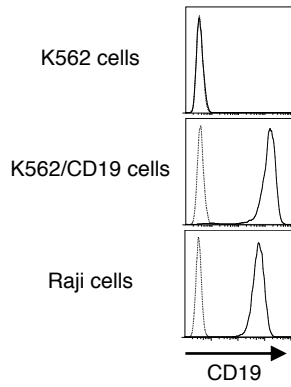

**b**

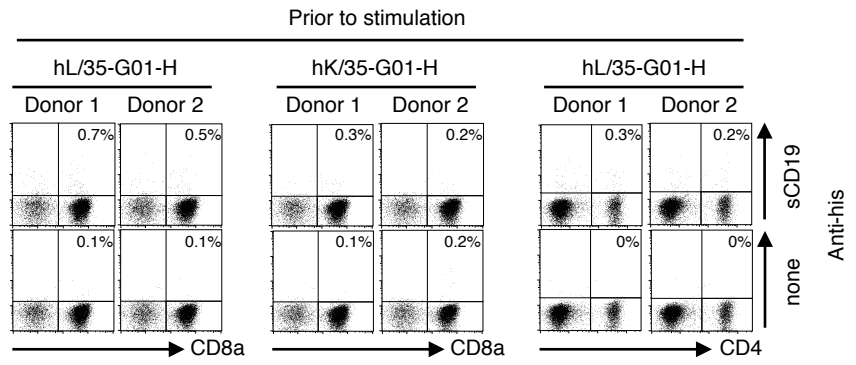

**c**

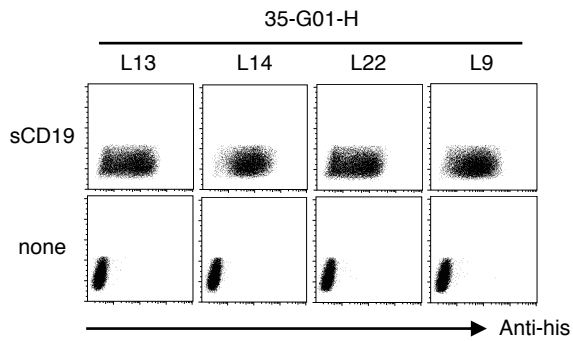

**d**

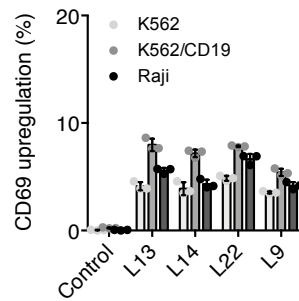

**e**

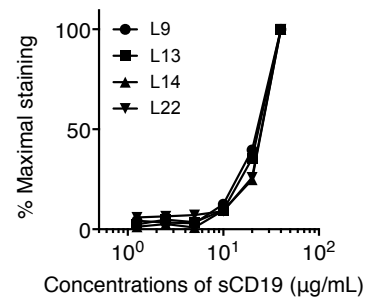

**Supplementary Figure 5. Characteristics of new scFv-expressing CD19 CAR-T cells.**

**a** CD19 expression of K562 cells, K562/CD19 cells, and Raji cells was assessed by flow cytometry. The dotted line shows an isotype control. **b** CD19 CAR-library T cells prior to stimulation were stained with 40  $\mu\text{g}/\text{mL}$  sCD19 dimer or PE-anti-his mAb alone, and each dot plot is shown. Each percentage of sCD19 dimer-positive cells among CAR-library T cells is displayed. Stainings of the CD19 CAR-library T cells after antigen-specific stimulation are depicted in Fig. 4c. **c** CAR encoding newly isolated light chains (L13, L14, L22, or L9) paired with 35-G01-H was individually reconstituted in Jurkat 76 cells. Jurkat 76/CAR transfectants were stained with 40  $\mu\text{g}/\text{mL}$  sCD19 dimer or PE-anti-his mAb alone. **d** Jurkat 76/CAR transfectants were incubated with the indicated target cells, and their CD69 upregulation was examined by flow cytometry. The experiments were performed in triplicate, and error bars show the SD. **e** Jurkat 76/CAR transfectants were stained with graded concentrations of sCD19 dimer. Percentage maximal staining was calculated, similarly to Fig. 4g.

# Supplementary Figure 6

**a**

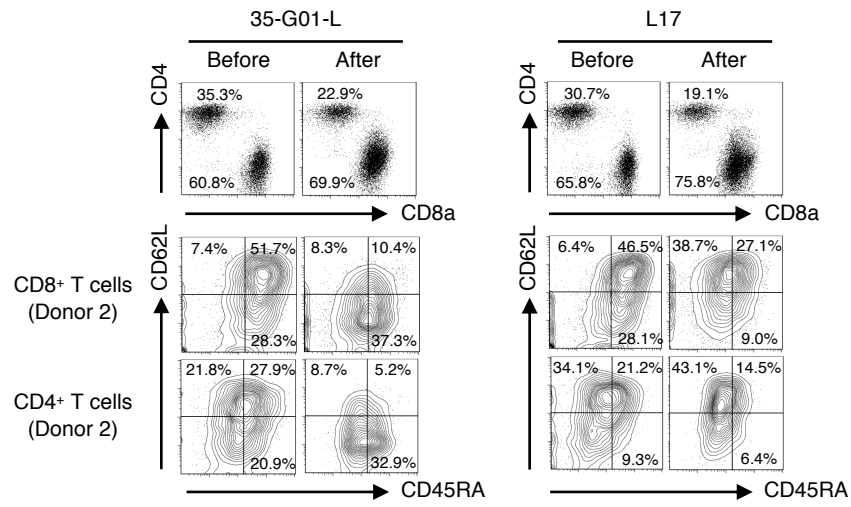

**b**

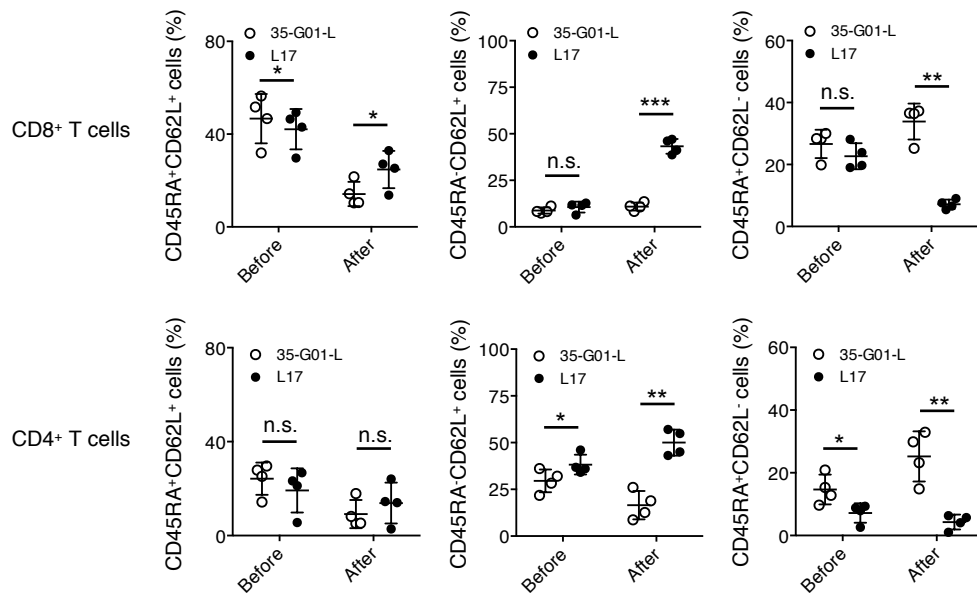

**Supplementary Figure 6. T-cell phenotypes of CD19 CAR-T cells after stimulation.**

**a** The positivity of CD8<sup>+</sup> and CD4<sup>+</sup> T cells among L17, or 35-G01-L CAR-T cells derived from donor 2 before and after stimulation with Raji cells is shown (top). The proportions of CD45RA and/or CD62L-positive cells among L17, or 35-G01-L CAR CD8<sup>+</sup> T cells and CD4<sup>+</sup> T cells (donor 2) are also depicted, respectively (middle, bottom). **b** The percentages of CD45RA<sup>+</sup>CD62L<sup>+</sup>, CD45RA<sup>-</sup>CD62L<sup>+</sup>, and CD45RA<sup>+</sup>CD62L<sup>-</sup> cells among CAR CD8<sup>+</sup> T cells and CD4<sup>+</sup> T cells of 4 different donors before and after stimulation are shown. Each dot depicts the percentage of the indicated population among CAR-T cells generated from each donor. Differences between L17 and 35-G01-L CAR-T cells were statistically analyzed by paired t test (two-sided). \*,  $p < 0.05$ ; \*\*,  $p < 0.01$ ; \*\*\*,  $p < 0.001$ ; n.s., not significant.

# Supplementary Figure 7

**a**

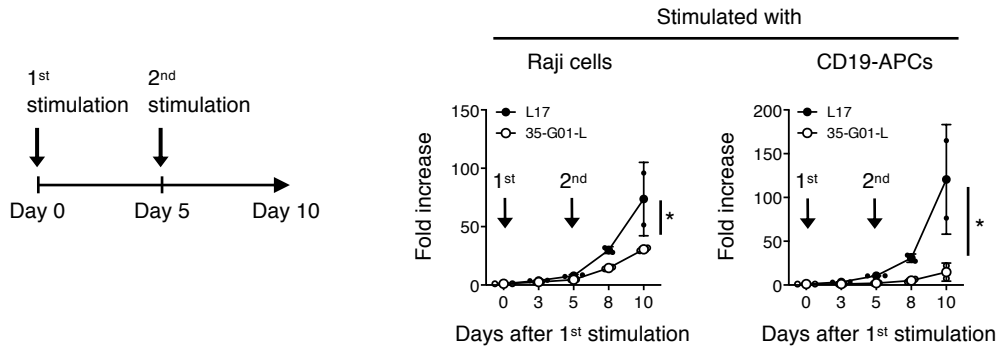

**b**

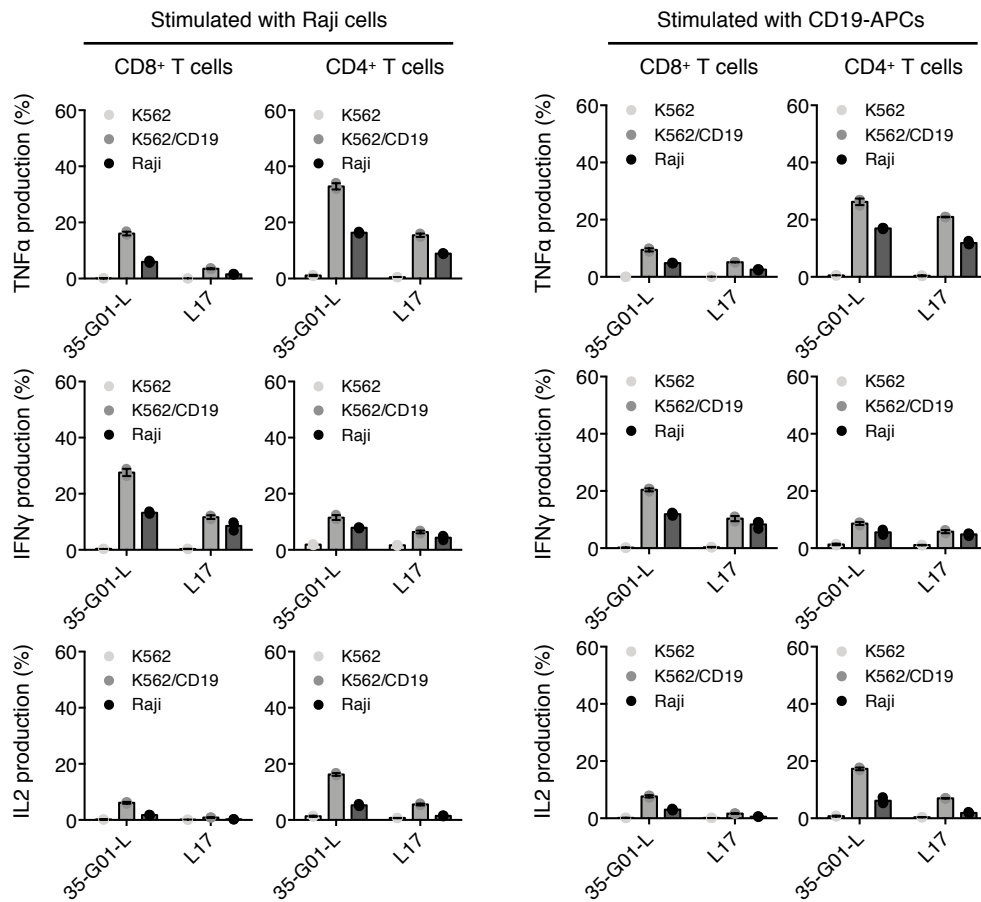

**c**

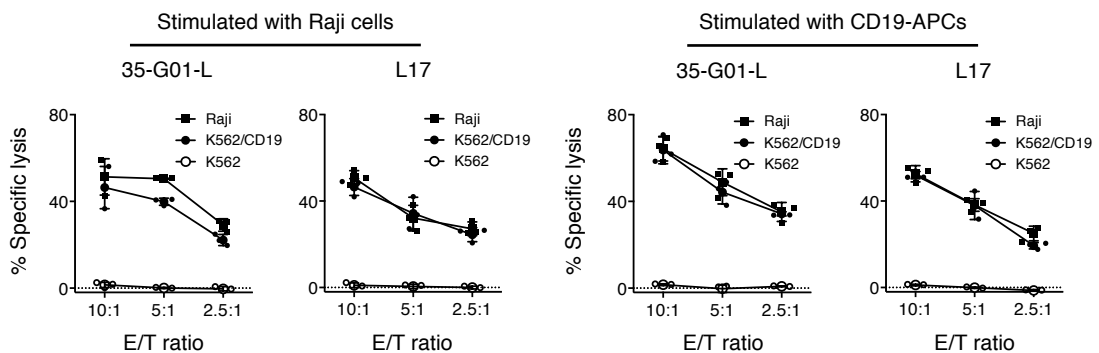

**Supplementary Figure 7. Characteristics of CD19 CAR-T cells repeatedly stimulated with CD19<sup>+</sup> target cells.**

**a** L17 and 35-G01-L CAR-T cells were stimulated twice with Raji cells (E/T 1:1) or CD19-APCs (E/T 10:1) on Day 0 and Day 5 (left). The fold increase of CAR-T cells established from 2 different donors after the first stimulation is shown (right). Arrows inside the graphs indicate the time point of stimulation. Error bars indicate the SD. Two-way ANOVA with Sidak's correction was conducted for multiple comparisons. \*,  $p < 0.05$ . **b** Cytokine production by L17, and 35-G01-L CAR-T cells against the indicated target cells following two stimulations was assessed using intracellular cytokine assays. The experiments were performed in triplicate, and error bars show the SD. **c** Cytotoxicity of expanded L17 and 35-G01-L CAR-T cells against target cells was examined by <sup>51</sup>Cr-release assays. The experiments were performed in triplicate, and error bars depict the SD.

# Supplementary Figure 8

**a**

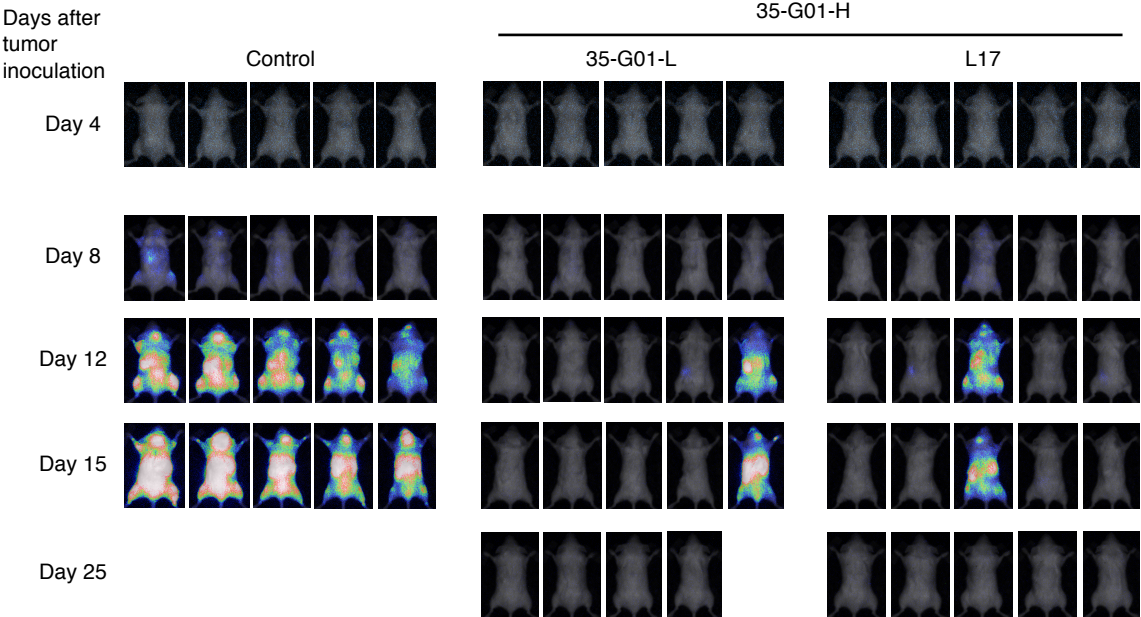

**b**

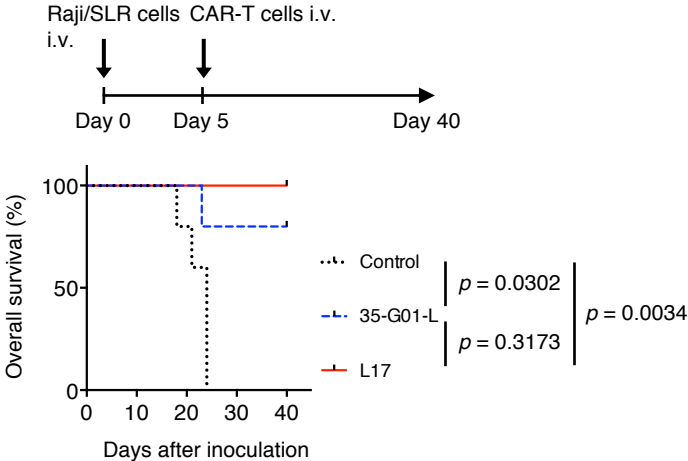



**Supplementary Figure 8. *In vivo* antitumor effects of CD19 CAR-T cells.**

**a, b** Five hundred thousand Raji/SLR cells were intravenously injected into irradiated NOD/Shi-scid IL2rgamma(null) mice. After confirming the engraftment of Raji/SLR cells by bioluminescence imaging assays on Day 4,  $2.0 \times 10^6$  CAR-T cells or control T cells were intravenously injected on Day 5. Photon images of mice on Days 8, 12, 15, and 25 are shown (**a**). The treatment schedule is summarized, and the overall survival of each group ( $n = 5$  mice per group) is represented and compared in the form of a Kaplan-Meier curve, similarly to Fig. 6a. Log-rank (Mantel-Cox) test was performed, and  $p$  values are also shown (**b**).

# Supplementary Figure 9

**a**

## The *in vitro* scFv generation system

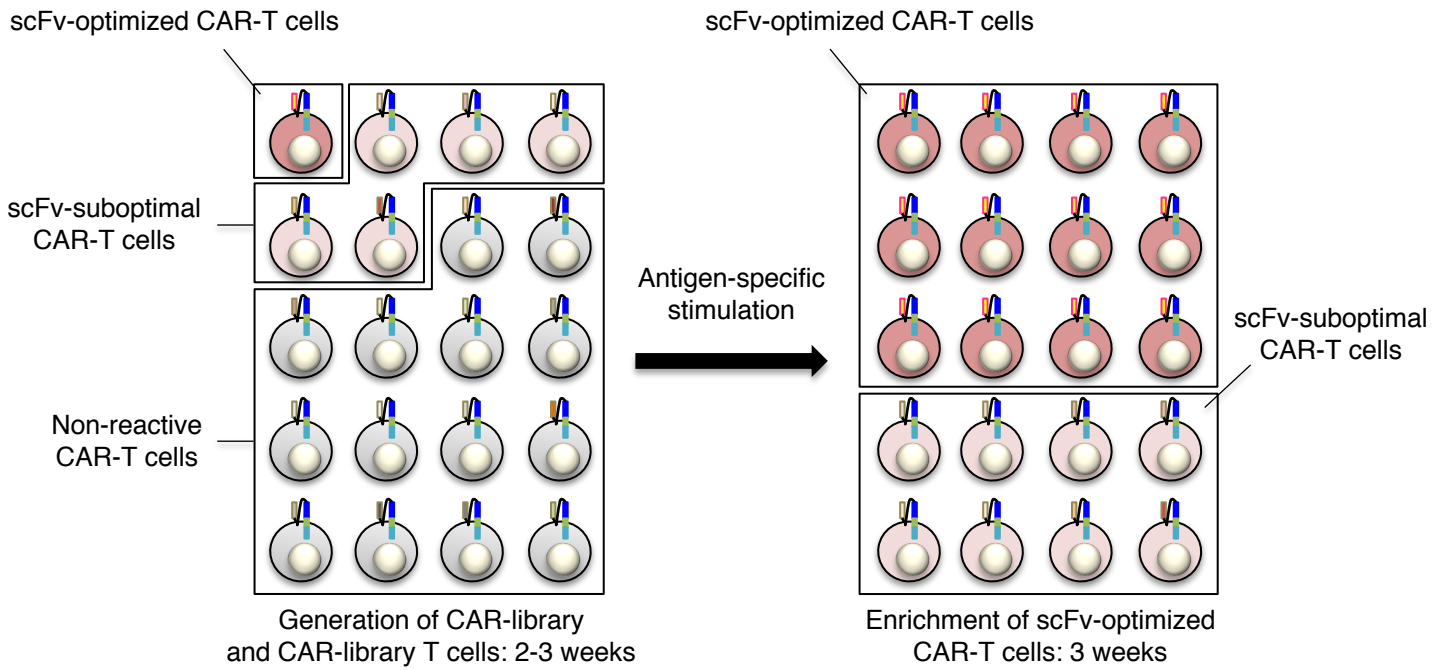

**b**

## *In vivo* antitumor functions of CAR-T cells

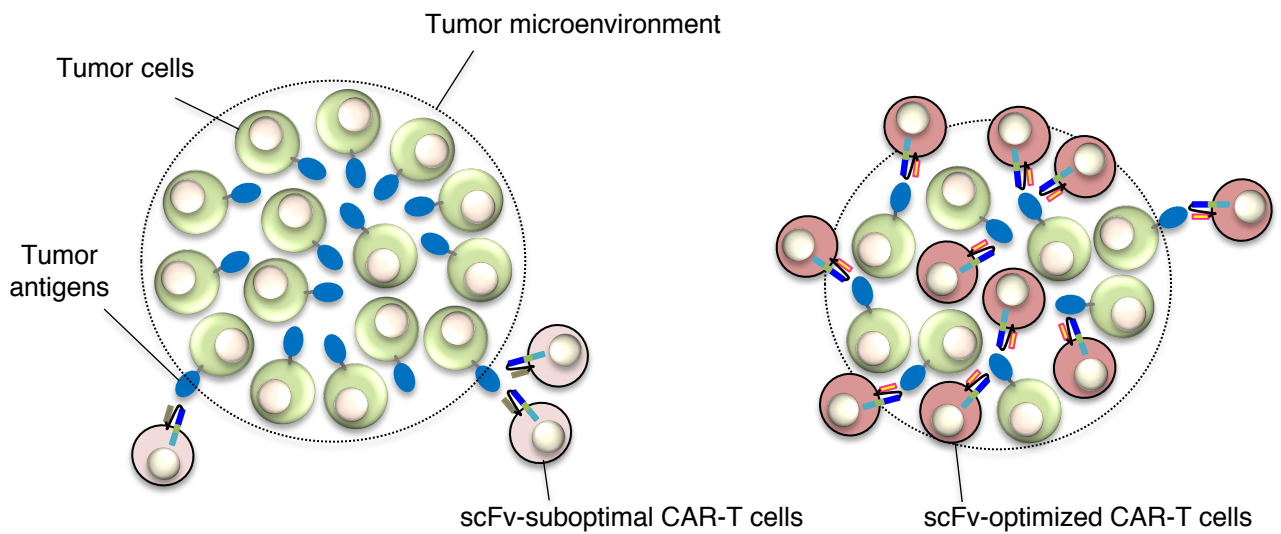

**Supplementary Figure 9. The *in vitro* scFv generation system potentially yielding CAR-T cells with superior *in vivo* antitumor function.**

**a** The *in vitro* scFv generation system using CAR-library T cells. ScFv-optimized (dark red), scFv-suboptimal (light red), and non-reactive (gray) CAR-T cells are included among CAR-library T cells (left). Since scFv-optimized CAR-T cells have a survival and proliferation advantage over scFv-suboptimal CAR-T cells after antigen-specific stimulation of CAR-library T cells, the former appears to be well concentrated, allowing identification of new scFvs that can endow CAR-T cells with superior antitumor function *in vivo* (right). The times required for generation of CAR-library and CAR-library T cells and enrichment of scFv-optimized CAR-T cells are shown similarly to Fig. 1. The supporting data are shown in Fig. 5, Supplementary Fig. 6, 7. **b** The cartoons summarize the results shown in Fig. 6. ScFv-suboptimal CAR-T cells (light red) appear to be localized around the tumor site *in vivo* (left), whereas scFv-optimized CAR-T cells (dark red) seem to infiltrate diffusely and accumulate within the tumor, recognizing and killing tumor cells *in vivo* (right). These *in vivo* antitumor effects may be explained by sufficient antitumor cytotoxicity, superior proliferation capacity, and durable phenotypes of CAR-T cells expressing the scFv optimized by our *in vitro* scFv generation system.

Supplementary Table 1

| Clone                                                                      | Variable region | CDR3            | J region | Structural avidity<br>(EC <sub>50</sub> : µg/mL) | Functional avidity<br>(EC <sub>50</sub> : µg/mL) |
|----------------------------------------------------------------------------|-----------------|-----------------|----------|--------------------------------------------------|--------------------------------------------------|
| <b>Variable regions of light chain (lambda chain) pairing with 3M4E5-H</b> |                 |                 |          |                                                  |                                                  |
| 3M4E5-L                                                                    | 2-11*01         | CWSFAGSYVVF     | 1*01     | 0.002                                            | 0.162                                            |
| L1                                                                         | 2-8*01          | CSSYAGSNSVF     | 1*01     | 0.005                                            | 0.031                                            |
| L102                                                                       | 2-8*01          | CSSYAGSGSTPFVVF | 1*01     | 0.017                                            | 0.122                                            |
| L73                                                                        | 2-14*01         | CSSYSGSSTWVF    | 3*02     | 0.036                                            | 0.270                                            |
| L124                                                                       | 2-14*01         | CCSYAGRRYVF     | 1*01     | 0.141                                            | 0.624                                            |
| L88                                                                        | 2-11*01         | CCSYAGGYVVF     | 1*01     | 0.171                                            | 0.459                                            |
| L66                                                                        | 2-14*01         | CSSYTSSSTYVF    | 1*01     | 1.197                                            | 0.997                                            |
| L80                                                                        | 2-14*02         | CSSYTSSSTFAVF   | 7*01     | NC                                               | NC                                               |
| L52                                                                        | 1-40*01         | CGTWDSLSAGVF    | 7*01     | NC                                               | NC                                               |
| <b>Variable regions of heavy chain pairing with 3M4E5-L</b>                |                 |                 |          |                                                  |                                                  |
| 3M4E5-H                                                                    | 3-23*01         | CAGELLPYYGMDVW  | 6*02     | 0.009                                            | 0.248                                            |
| H73                                                                        | 4-34*09         | CARCPYYYYGMDVW  | 6*02     | 0.016                                            | 0.043                                            |
| H1                                                                         | 4-59*01         | CARESYYYGMDVW   | 6*02     | 0.066                                            | 0.065                                            |

**Supplementary Table 1. Variable regions and CDR3 sequences of A2/NY-ESO-1<sub>157</sub>-specific VL and VH, and characteristics of CAR-T cells expressing each scFv.**

According to the nomenclature of the IMGT (<http://www.imgt.org/>), the variable regions and amino acid sequences of the CDR3 region of newly identified and original light chains and heavy chains specific for A2/NY-ESO-1<sub>157</sub> are summarized. The structural avidity and functional avidity of Jurkat 76/CAR-T cells expressing each scFv are shown as the EC<sub>50</sub> value (µg/mL), measured as described in Fig. 2. NC, not calculated.

Supplementary Table 2

| Clone                                                                       | Variable region | CDR3          | J region | Structural avidity<br>(EC <sub>50</sub> : µg/mL) |
|-----------------------------------------------------------------------------|-----------------|---------------|----------|--------------------------------------------------|
| <b>Variable regions of light chain (lambda chain) pairing with 35-G01-H</b> |                 |               |          |                                                  |
| 35-G01-L                                                                    | 2-8*01          | CCSYAGRYNSVLF | 2*01     | 9.92                                             |
| L17                                                                         | 1-47*01         | CAAWDDSLSAIF  | 2*01     | 11.98                                            |
| L16                                                                         | 2-8*01          | CAAWDDSLNGVVF | 2*01     | 16.28                                            |
| L7                                                                          | 2-11*01         | CGTWDTSLTAVVF | 2*01     | 17.93                                            |
| L9                                                                          | 1-51*01         | CGTWESSLSGVVF | 2*01     | 18.84                                            |
| L13                                                                         | 2-14*01         | CSSYTTSTTWVF  | 3*02     | 19.23                                            |
| L14                                                                         | 2-14*01         | CCSYAGSYTFVVF | 2*01     | 20.91                                            |
| L22                                                                         | 2-14*01         | CHSYDSSLSHVF  | 1*01     | 21.31                                            |
| L4                                                                          | 3-1*01          | CQAWDSSTHVVF  | 2*01     | 21.58                                            |
| <b>Variable regions of light chain (kappa chain) pairing with 35-G01-H</b>  |                 |               |          |                                                  |
| K5                                                                          | 3-11*01         | CQQSYSTLLYTF  | 2*01     | 12.97                                            |
| K4                                                                          | 3-15*01         | CQQYNNWPPLYTF | 2*01     | 13.37                                            |
| K9                                                                          | 3-20*02         | CQQFNEWPLTF   | 4*01     | 15.38                                            |
| K6                                                                          | 3-15*01         | CQQYDSLPLTF   | 4*01     | 18.01                                            |

**Supplementary Table 2. Variable regions and CDR3 sequences of CD19-specific VL, and characteristics of CAR-T cells expressing each scFv.**

Based on the nomenclature of the IMGT (<http://www.imgt.org/>), the variable regions and amino acid sequences of the CDR3 region of newly isolated and original light chains specific for CD19 are listed. The structural avidity of CAR-T cells possessing each scFv is shown as the EC<sub>50</sub> value (μg/mL), calculated as the concentration of sCD19 dimer required to achieve 50% of the maximal staining.
