# Supplementary material for: A single-chain antibody generation system yielding CAR-T cells with superior antitumor function
Source: PubMed Central journal article supplement (PMC7925539; doi:10.1038/s42003-021-01791-1), 2021-03-02
Supplement: 42003_2021_1791_MOESM2_ESM.pdf [file 42003_2021_1791_MOESM2_ESM.pdf]

## **Description of Additional Supplementary Files**

**File Name:** Supplementary Data 1

**Description:** Source data for graphs in the main figures.
